# Supplementary material
Source: PubMed Central journal article supplement (PMC9906238)
Supplement: mmc1-sup1-figs1.pdf [file mmc1-sup1-figs1.pdf]

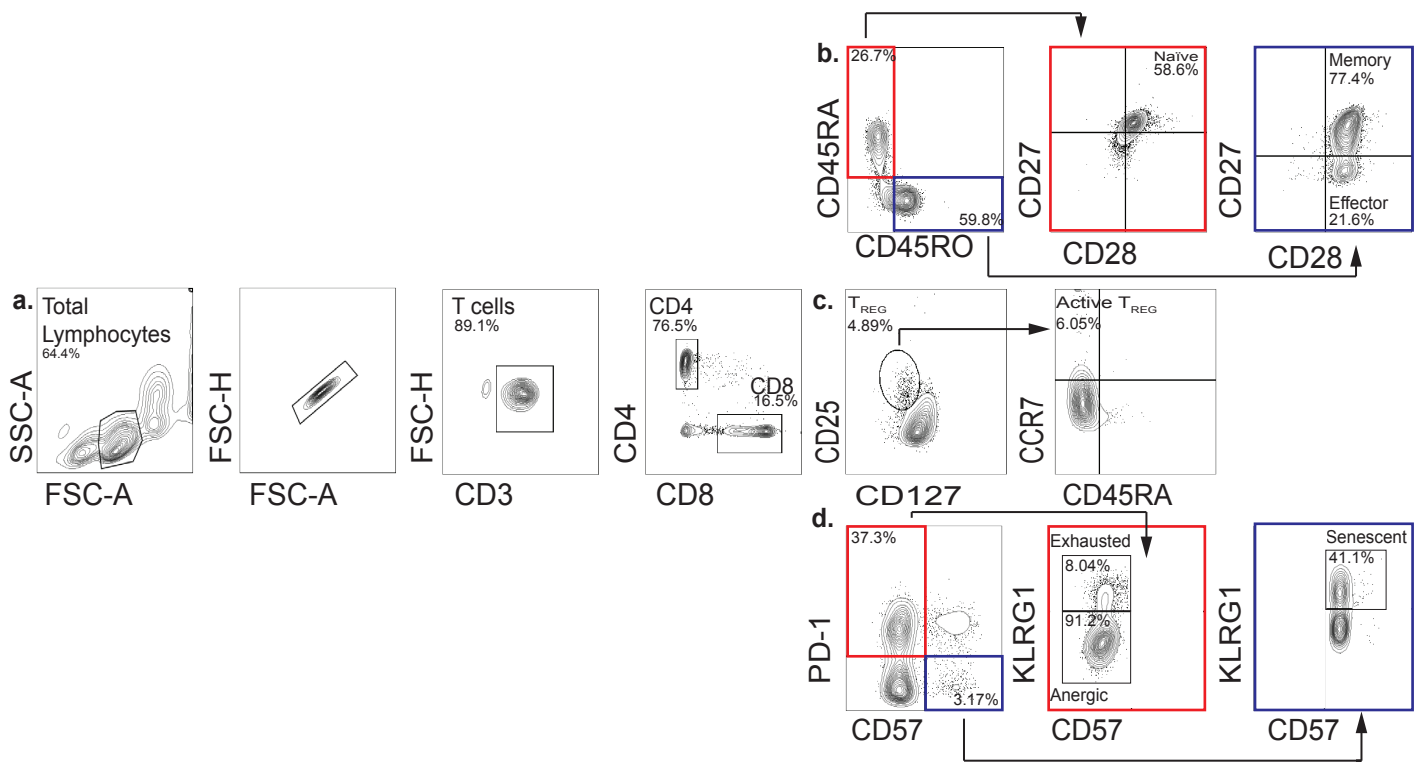

**Supplemental Figure 1. Gating strategy for total lymphocytes and T cell subsets.** a.) total lymphocytes, total T cells, CD4, and CD8 T cells b.) naïve, memory, and effector cells gated on CD4 and CD8 T cells c.) T<sub>REG</sub> and active T<sub>REG</sub> gated on CD4 T cells d.) exhausted, anergic, and senescent cells gated on CD4 and CD8 T cells.
