# Supplementary material
Source: PubMed Central journal article supplement (PMC9906238)
Supplement: mmc2-sup2-figs2.pdf [file mmc2-sup2-figs2.pdf]

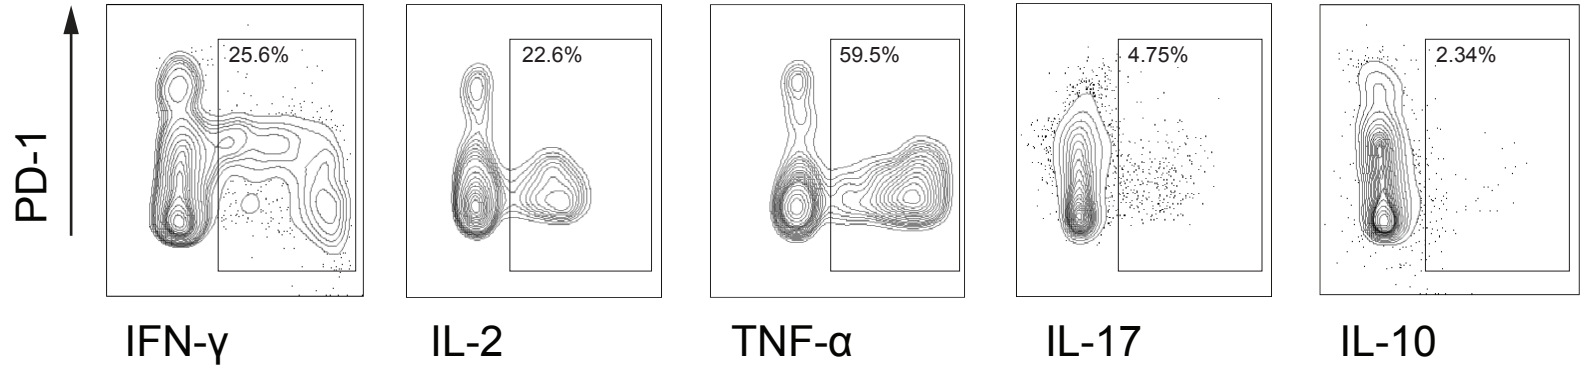

**Supplemental Figure 2. Gating strategy for intracellular cytokines.** Intracellular cytokines were measured in T cells upon *ex-vivo* stimulation with PMA and ionomycin for 5 h. Cytokines were plotted against PD-1 to verify PD-1<sup>+</sup> T cells were not secreting IFN- $\gamma$ , IL-2, TNF- $\alpha$ , IL-17, or IL-10. Plots are gated on CD4 T cells.
