# Supplementary material
Source: PubMed Central journal article supplement (PMC9906238)
Supplement: mmc3-sup3-figs3.pdf [file mmc3-sup3-figs3.pdf]

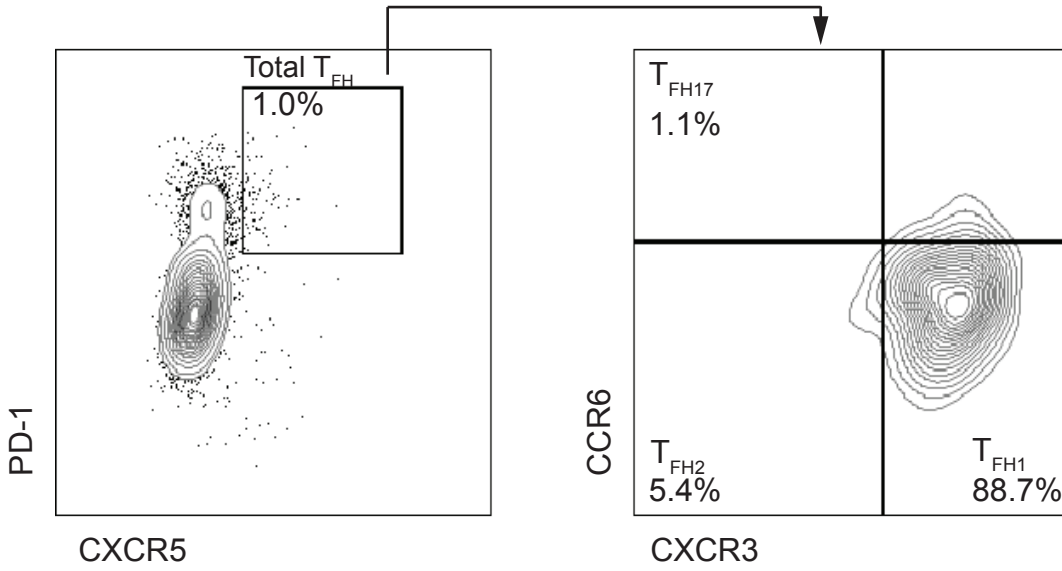

**Supplemental Figure 3. Gating strategy for Total T<sub>FH</sub> and T<sub>FH</sub> subsets.** Parent gate of Total T<sub>FH</sub> is CD4 T cells.
