# Supplementary material
Source: PubMed Central journal article supplement (PMC9906238)
Supplement: mmc4-sup4-figs4.pdf [file mmc4-sup4-figs4.pdf]

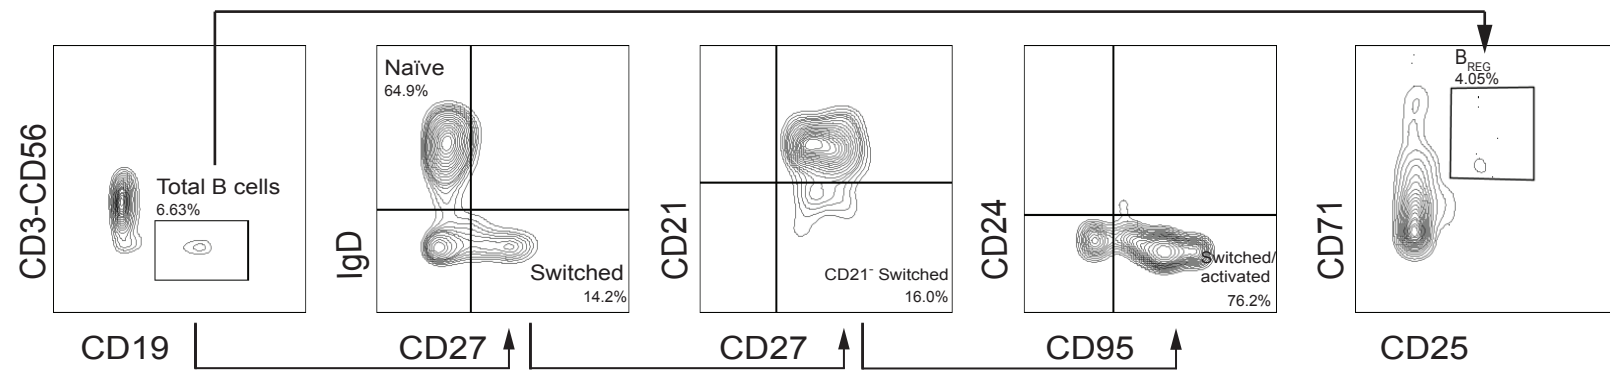

**Supplemental Figure 4. Gating strategy for Total B cells and activated B cell subsets.** Total B cells are gated on singlets.
